# Supplementary material for: Discovery of a new kimberlite pipe at Krishnapuram, Wajrakarur Kimberlite Field, Eastern Dharwar Craton: Constraints from Field Geology and Petrochemistry
Source: Research Square preprint supplement (doi:10.21203/rs.3.rs-6345392/v1), 2025-05-09
Supplement: Supplementary file 1 [file 2d39c97fd964353b099d08b8.docx]

| Mineral | **Olivine** | | | | **Phlogophite** | | | | **Cr-spinel** | | | |
| --- | --- | --- | --- | --- | --- | --- | --- | --- | --- | --- | --- | --- |
| Data  Set/Point | O20 / 1 . | O21 / 1 . | O22 / 1 . | O23 / 1 . | P1 / 1 . | P2 / 1 . | P3 / 1 . | 4 / 1 . | C18 / 1 . | C19 / 1 . | C68 / 1 . | C7 / 1 . |
| **SiO2** | 42.019 | 41.527 | 42.538 | 40.999 | 41.201 | 41.401 | 40.974 | 42.563 | 0.06 | 0.222 | 0.221 | 0.157 |
| **TiO2** | 0.023 | 0 | 0.008 | 0 | 1.573 | 1.84 | 1.479 | 1.344 | 3.624 | 4.265 | 5.016 | 4.823 |
| **Al2O3** | 0 | 0.013 | 0.015 | 0.021 | 10.181 | 10.064 | 9.977 | 10.532 | 8.039 | 12.541 | 11.895 | 10.709 |
| **Cr2O3** | 0.024 | 0.003 | 0 | 0.069 | 0 | 0.096 | 0 | 0 | 47.071 | 43.963 | 44.641 | 45.42 |
| **FeO** | 6.37 | 6.206 | 6.442 | 6.429 | 6.876 | 5.861 | 7.082 | 5.606 | 29.892 | 21.442 | 22.407 | 22.39 |
| **MnO** | 0.093 | 0.019 | 0.076 | 0.072 | 0.049 | 0 | 0.139 | 0.048 | 0.447 | 0.539 | 0.37 | 0.377 |
| **MgO** | 51.283 | 51.688 | 49.544 | 53.483 | 24.944 | 24.786 | 24.791 | 24.414 | 9.539 | 14.687 | 13.137 | 15.576 |
| **NiO** | 0.293 | 0.28 | 0.237 | 0.347 | 0 | 0 | 0 | 0 | 0 | 0 | 0 | 0 |
| **CaO** | 0.045 | 0.028 | 0.066 | 0 | 0.098 | 0.185 | 0.26 | 0.069 | 0.294 | 0.116 | 0.04 | 0.146 |
| **Na2O** | 0 | 0 | 0 | 0 | 0.08 | 0.073 | 0.075 | 0.083 | 0.044 | 0.04 | 0.042 | 0.053 |
| **K2O** | 0 | 0 | 0 | 0 | 9.808 | 10.561 | 9.349 | 10.138 | 0.004 | 0 | 0 | 0.014 |
| Total | 100.15 | 99.764 | 98.926 | 101.42 | 94.81 | 94.867 | 94.126 | 94.797 | 99.058 | 97.815 | 97.769 | 99.841 |
| O | 4 | 4 | 4 | 4 | 22 | 22 | 22 | 22 | 4 | 4 | 4 | 4 |
| Si apfu | 1.011 | 1.003 | 1.034 | 0.979 | 5.956 | 5.979 | 5.965 | 6.100 | 0.002 | 0.007 | 0.007 | 0.005 |
| Ti | 0.000 | 0.000 | 0.000 | 0.000 | 0.171 | 0.200 | 0.162 | 0.145 | 0.094 | 0.106 | 0.125 | 0.118 |
| Al | 0.000 | 0.000 | 0.000 | 0.001 | 1.735 | 1.713 | 1.712 | 1.779 | 0.328 | 0.486 | 0.465 | 0.411 |
| Cr | 0.000 | 0.000 | 0.000 | 0.001 | 0.000 | 0.011 | 0.000 | 0.000 | 1.288 | 1.143 | 1.170 | 1.168 |
| Fe(ii) | 0.128 | 0.125 | 0.131 | 0.128 | 0.831 | 0.708 | 0.862 | 0.672 | 0.865 | 0.590 | 0.621 | 0.609 |
| Mn | 0.002 | 0.000 | 0.002 | 0.001 | 0.006 | 0.000 | 0.017 | 0.006 | 0.013 | 0.015 | 0.010 | 0.010 |
| Mg | 1.840 | 1.862 | 1.795 | 1.903 | 5.376 | 5.337 | 5.380 | 5.216 | 0.492 | 0.720 | 0.649 | 0.755 |
| Ni | 0.006 | 0.005 | 0.005 | 0.007 | 0.000 | 0.000 | 0.000 | 0.000 | 0.000 | 0.000 | 0.000 | 0.000 |
| Ca | 0.001 | 0.001 | 0.002 | 0.000 | 0.015 | 0.029 | 0.041 | 0.011 | 0.011 | 0.004 | 0.001 | 0.005 |
| Na | 0.000 | 0.000 | 0.000 | 0.000 | 0.022 | 0.020 | 0.021 | 0.023 | 0.003 | 0.003 | 0.003 | 0.003 |
| K | 0.000 | 0.000 | 0.000 | 0.000 | 1.809 | 1.946 | 1.736 | 1.853 | 0.000 | 0.000 | 0.000 | 0.001 |
| TOTAL | 2.989 | 2.997 | 2.968 | 3.020 | 15.921 | 15.942 | 15.896 | 15.804 | 3.096 | 3.074 | 3.052 | 3.085 |
| Fo | 93.397 | 93.672 | 93.127 | 93.617 |  |  |  |  |  |  |  |  |
| Fa | 6.507 | 6.308 | 6.792 | 6.312 |  |  |  |  |  |  |  |  |
| Tp | 0.096 | 0.020 | 0.081 | 0.072 |  |  |  |  |  |  |  |  |
| Mg# | 0.935 | 0.937 | 0.932 | 0.937 | 0.866 | 0.883 | 0.862 | 0.886 |  |  |  |  |
| XFe |  |  |  |  | 0.134 | 0.117 | 0.138 | 0.114 |  |  |  |  |
| Fe3+ |  |  |  |  |  |  |  |  | 0.288 | 0.258 | 0.233 | 0.298 |
| Fe2+ |  |  |  |  |  |  |  |  | 0.577 | 0.332 | 0.388 | 0.311 |
| Fe3+/Fe2+ | |  |  |  |  |  |  |  | 0.499 | 0.776 | 0.600 | 0.960 |
| XMg |  |  |  |  |  |  |  |  | 0.363 | 0.550 | 0.511 | 0.554 |
| XMg* |  |  |  |  |  |  |  |  | 0.460 | 0.684 | 0.626 | 0.708 |
| YCr |  |  |  |  |  |  |  |  | 0.676 | 0.606 | 0.626 | 0.622 |
| YAl |  |  |  |  |  |  |  |  | 0.172 | 0.258 | 0.249 | 0.219 |
| YFe3 |  |  |  |  |  |  |  |  | 0.151 | 0.137 | 0.125 | 0.159 |
| Cr# |  |  |  |  |  |  |  |  | 0.797 | 0.702 | 0.716 | 0.740 |
