# Supplementary material for: Discovery of a new kimberlite pipe at Krishnapuram, Wajrakarur Kimberlite Field, Eastern Dharwar Craton: Constraints from Field Geology and Petrochemistry
Source: Research Square preprint supplement (doi:10.21203/rs.3.rs-6345392/v1), 2025-05-09
Supplement: Supplementary file 2 [file 3a2bcd7a0c520a12ce3a025a.docx]

Table 1. Representative microprobe analysis of olivine, phlogopite and Cr-spinel from newly discovered Chigicherla kimberlite (CC-6), East Dharwar Craton.

Table.2. Representative bulk rock major and trace element compositions of newly discovered Chigicherla kimberlite (CC-6), East Dharwar Craton.
