# Supplementary material for: Discovery of a new kimberlite pipe at Krishnapuram, Wajrakarur Kimberlite Field, Eastern Dharwar Craton: Constraints from Field Geology and Petrochemistry
Source: Research Square preprint supplement (doi:10.21203/rs.3.rs-6345392/v1), 2025-05-09
Supplement: Supplementary file 3 [file d029545537db6fdacea83fb5.docx]

| Rock Type | Kimberlite, CC-6 | | | | | |
| --- | --- | --- | --- | --- | --- | --- |
| Sample No | CC-6/1 | CC-6/2 | CC-6/3 | CC-6/4 | CC-6/5 | CC-6/6 |
| Wt% |  |  |  |  |  |  |
| SiO2 | 33.86 | 33.17 | 33.64 | 33.64 | 33.97 | 33.01 |
| Al2O3 | 2.19 | 2.4 | 2.37 | 2.45 | 2.24 | 2.67 |
| Fe2O3 | 8.31 | 8.27 | 8.3 | 8.43 | 8.22 | 8.43 |
| MnO | 0.12 | 0.13 | 0.12 | 0.11 | 0.12 | 0.12 |
| MgO | 25.13 | 25.09 | 25.15 | 26.22 | 25.65 | 26.83 |
| CaO | 9.95 | 10.84 | 9.55 | 9.04 | 10.29 | 8.05 |
| Na2O | 0.00 | 0.00 | 0.00 | 0.00 | 0.00 | 0.00 |
| K2O | 0.97 | 0.92 | 1.25 | 1.30 | 1.00 | 1.31 |
| TiO2 | 1.25 | 1.33 | 1.28 | 1.26 | 1.22 | 1.26 |
| P2O5 | 0.32 | 0.35 | 0.32 | 0.29 | 0.32 | 0.32 |
| LOI | 17.202 | 17.429 | 17.49 | 16.853 | 16.516 | 17.674 |
| Total | 99.302 | 99.929 | 99.47 | 99.593 | 99.546 | 99.674 |
| Trace in ppm |  |  |  |  |  |  |
| Ba | 2238 | 1967 | 2103 | 2047 | 2383 | 1903 |
| Ga | 6 | 5 | 6 | 6 | 5 | 7 |
| Sc | 10 | 14 | 14 | 14 | 11 | 12 |
| V | 75 | 70 | 81 | 68 | 74 | 66 |
| Pb | 30 | 30 | 30 | 20 | 25 | 25 |
| Ni | 1090 | 1070 | 1105 | 1075 | 1065 | 1095 |
| Co | 105 | 105 | 100 | 90 | 95 | 90 |
| Rb | 109.027 | 97.944 | 112.224 | 140.204 | 123.622 | 119.607 |
| Sr | 1114 | 1056 | 1174 | 1101 | 1335 | 1055 |
| Y | 16 | 16 | 15 | 15 | 15 | 15 |
| Zr | 216 | 229 | 203 | 179 | 199 | 198 |
| Nb | 119 | 125 | 118 | 117 | 112 | 116 |
| Cr | 440 | 385 | 320 | 350 | 285 | 305 |
| Be | 2.155 | 2.75 | 3.752 | 2.571 | 2.541 | 2.51 |
| Ge | 0.597 | 0.557 | 0.664 | 0.568 | 1.484 | 0.516 |
| La | 138.124 | 152.988 | 131.428 | 136.433 | 155.897 | 127.506 |
| Ce | 203.474 | 285.408 | 203.346 | 208.17 | 319.909 | 219.336 |
| Pr | 28.55 | 32.981 | 28.55 | 28.933 | 39.878 | 27.71 |
| Nd | 98.04 | 117.195 | 100.029 | 100.736 | 145.61 | 96.052 |
| Eu | 3.758 | 4.523 | 3.642 | 4.025 | 5.677 | 3.578 |
| Sm | 14.235 | 16.404 | 14.407 | 14.327 | 23.279 | 14.064 |
| Tb | 1.171 | 1.272 | 1.164 | 1.161 | 1.637 | 1.14 |
| Gd | 9.172 | 10.154 | 8.799 | 9.164 | 13.196 | 8.969 |
| Dy | 4.985 | 5.66 | 4.957 | 4.933 | 6.567 | 4.688 |
| Ho | 0.694 | 0.841 | 0.766 | 0.737 | 0.926 | 0.685 |
| Er | 1.667 | 1.787 | 1.79 | 1.671 | 2.1 | 1.666 |
| Tm | 0.202 | 0.238 | 0.212 | 0.209 | 0.248 | 0.194 |
| Yb | 1.048 | 1.301 | 1.243 | 1.183 | 1.421 | 0.975 |
| Lu | 0.156 | 0.175 | 0.191 | 0.155 | 0.2 | 0.144 |
| Hf | 8.916 | 8.507 | 14.309 | 6.445 | 9.911 | 6.712 |
| Ta | 9.567 | 10.335 | 9.154 | 10.281 | 9.277 | 9.433 |
| U | 18.404 | 20.101 | 21.515 | 18.551 | 24.479 | 17.625 |
| Th | 14.192 | 12.806 | 10.515 | 11.387 | 13.468 | 10.673 |
